# Supplementary material for: Enhanced cellular uptake of engineered spider silk particles
Source: Royal Society of Chemistry journal article supplement (doi:10.1039/c4bm00401a), 2015-01-01
Supplement: c4bm00401a2.pdf [file c4bm00401a2.pdf]

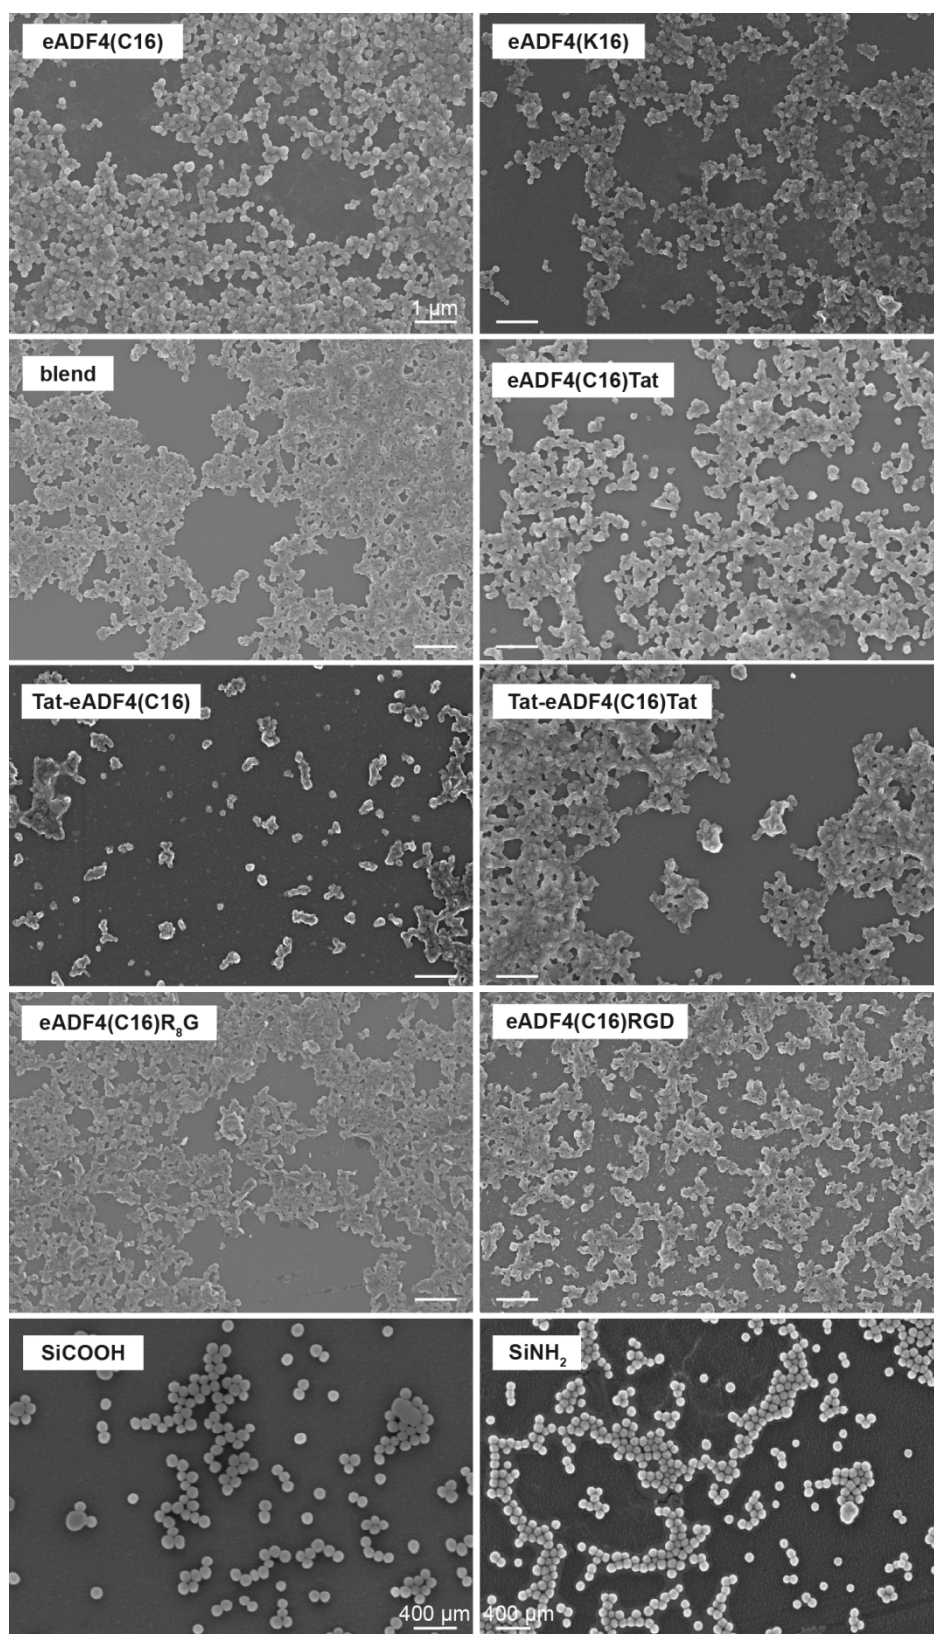

**Fig. 1** Images (SEM) of spider silk and silica particles. Spider silk particles were prepared from a 0.1 mg/ml solution in EMIM[acetat] and analyzed in the dehydrated state. Scale bars: 1 μm (spider silk particles); 400 nm (silica particles)

**Table S 1**

Cells at a starting density of 50,000 cells/cm<sup>2</sup> were incubated in the presence of particles for 6 h in the absence and presence of endocytosis inhibitor (100 μM of dansylcadaverine (DC) or di-methyl-amiloride (DMA)) at 37 °C.

Inhibitors were added 30 min before particle addition.

|                            | Cells with particles /<br>% | Cells with particles /<br>% + DC | Cells with particles /<br>% + DMA |
|----------------------------|-----------------------------|----------------------------------|-----------------------------------|
| eADF4(k16)                 | 63.9 ± 15.5                 | 27.3 ± 13.9                      | 44.0 ± 13.6                       |
| blend                      | 12.3 ± 4.4                  | 3.4 ± 1.6                        | 5.5 ± 2.0                         |
| eADF4(C16)R <sub>8</sub> G | 27.3 ± 7.5                  | 17.8 ± 8.0                       | 20.7 ± 14.6                       |
| Tat-eADF4(C16)             | 14.1 ± 10.5                 | 7.0 ± 2.1                        | 11.3 ± 7.4                        |
| eADF4(C16)RGD              | 20.7 ± 5.8                  | 15.3 ± 2.1                       | 12.6 ± 4.0                        |
| eADF4(C16)                 | 7.8 ± 4.4                   | 5.4 ± 0.1                        | 2.4 ± 0.7                         |
| SiNH <sub>2</sub>          | 0.3 ± 0.3                   | 1.5 ± 0.6                        | 0.4 ± 0.8                         |
| SiCOOH                     | 0.6 ± 0.7                   | 2.5 ± 0.9                        | 2.1 ± 0.6                         |
