# Supplementary figures and images for: Enhanced cellular uptake of engineered spider silk particles
Source: Royal Society of Chemistry journal article supplement (doi:10.1039/c4bm00401a), 2015-01-01

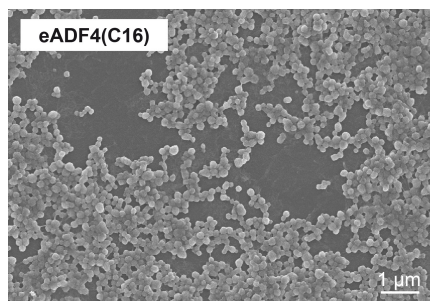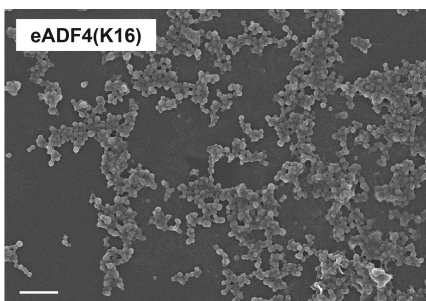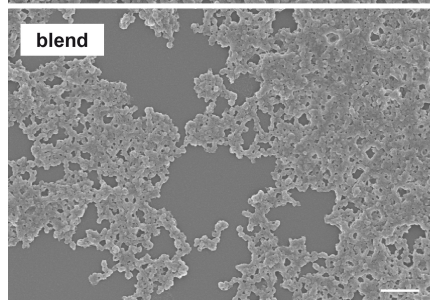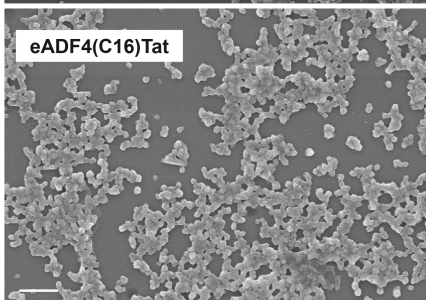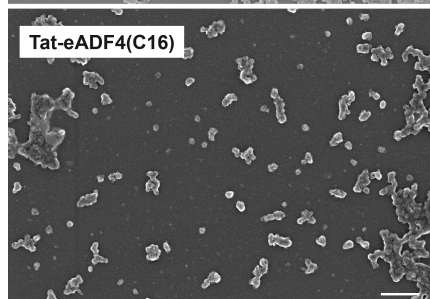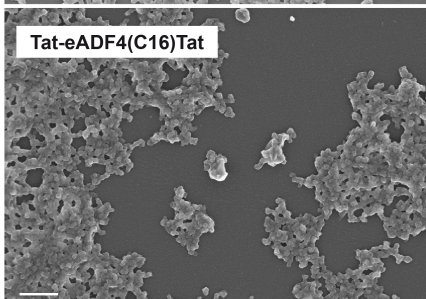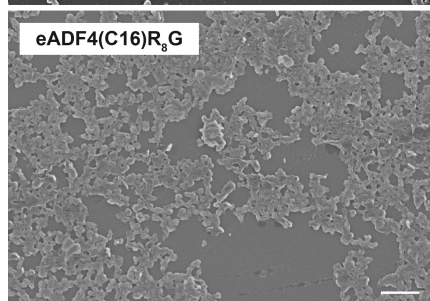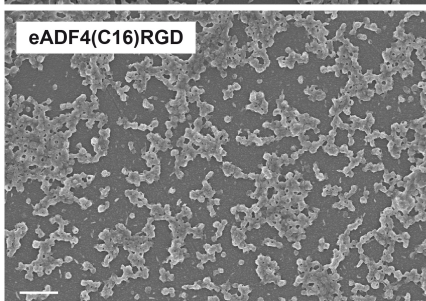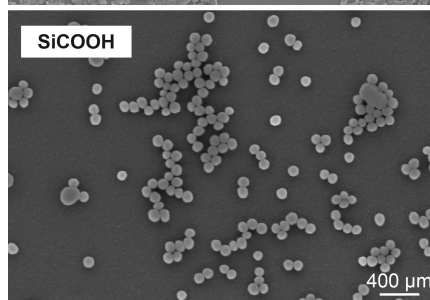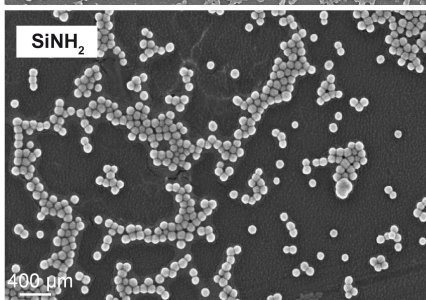

Supplement: c4bm00401a1.pdf [file c4bm00401a1.pdf]
